# Supplementary material for: Soil nutrient adequacy for optimal cassava growth, implications on cyanogenic glucoside production: A case of konzo-affected Mtwara region, Tanzania
Source: PLoS One. 2019 May 13;14(5):e0216708. doi: 10.1371/journal.pone.0216708 (PMC6513093; doi:10.1371/journal.pone.0216708)
Supplement: S3 Dataset — (XLSX) [file pone.0216708.s005.xlsx]

## Sheet: Sheet1
Sample	District	Q1	Q2	Q3	Q4	Q5	Q7	Q8	Q9	Q10	Q11	Q14	Q15	Q16	Q6maiz	Q6sorg	Q6mille	Q6rice	Q6pigp	Q6cow	Q6bamb	Q6gnut	Q6ses	Q6swepot	Q6pum	Q6yam	Q6pineap	Q6cash	Q6bana	Q6mango
1	Newala	0	888	888	888	2	1	1	1	1	1	1	3	2	1	0	0	0	1	0	0	0	0	0	0	0	0	0	0	0
2	Newala	1	999	1	0	2	0	888	2	1	1	1	5	2	1	0	0	0	1	0	0	0	0	0	0	0	0	0	0	0
3	Newala	0	888	888	888	2	0	888	1	0	0	1	888	888	1	1	0	0	0	0	0	0	0	0	0	0	0	0	0	0
4	Newala	0	888	888	888	2	0	888	2	1	1	1	4	2	1	1	0	0	1	0	0	0	0	0	0	0	0	0	0	0
5	Newala	0	888	888	888	2	1	1	2	1	0	1	999	999	1	0	0	0	0	0	0	0	0	0	0	0	0	1	0	0
6	Newala	0	888	888	888	2	999	999	1	0	0	1	888	888	1	0	0	0	1	0	0	0	0	0	0	0	0	1	0	0
7	Newala	1	999	1	1	2	1	1	1	0	1	1	888	888	1	1	0	0	1	0	0	0	0	0	0	0	0	0	0	0
8	Newala	0	888	888	888	2	0	888	3	0	1	1	888	888	1	0	1	0	1	1	0	0	0	0	0	0	0	0	0	0
9	Newala	1	999	1	1	2	0	888	0	0	0	1	3	2	1	0	1	0	1	0	1	1	0	0	0	0	0	0	0	0
10	Newala	1	999	1	1	2	0	888	2	0	0	1	888	888	1	1	1	0	1	1	1	0	1	0	1	0	0	1	0	0
11	Newala	0	888	888	888	2	0	888	999	1	0	1	888	888	1	0	0	0	0	0	0	0	0	0	0	0	0	0	0	0
12	Newala	1	999	1	1	2	0	888	1	0	0	1	3	2	1	1	0	0	0	0	0	0	0	0	0	0	0	0	0	0
13	Newala	0	888	888	888	2	1	1	2	0	0	1	4	2	1	0	0	0	0	1	0	0	0	0	0	0	0	1	0	0
14	Newala	0	888	888	888	2	0	888	2	0	1	1	3	3	1	0	0	0	1	1	0	0	0	0	0	0	0	1	0	0
15	Newala	0	888	888	888	2	0	888	3	0	0	1	888	888	1	1	0	1	1	0	0	0	0	0	0	0	0	0	0	0
16	Newala	0	888	888	888	2	1	1	1	0	0	1	2	2	1	1	1	0	1	0	0	1	1	0	0	0	0	1	0	0
17	Newala	0	888	888	888	2	0	888	2	1	0	1	888	888	1	0	1	1	1	0	0	0	0	0	0	0	0	1	0	0
18	Newala	1	999	1	1	2	0	888	2	0	0	1	2	2	1	1	1	0	1	0	0	0	0	0	0	0	0	1	0	0
19	Newala	0	888	888	888	2	0	888	3	0	0	1	2	2	1	0	0	0	1	0	1	1	0	0	0	0	0	0	0	0
20	Newala	0	888	888	888	2	1	0	2	0	0	1	3	5	1	0	1	1	1	0	0	0	0	0	0	0	0	1	0	0
21	Newala	1	999	1	1	2	0	888	1	0	0	1	888	888	1	1	1	0	0	0	1	1	0	0	0	0	0	0	0	0
22	Newala	0	888	888	888	2	1	1	2	0	0	1	888	888	0	0	0	0	1	0	0	0	0	0	0	0	0	1	1	0
23	Newala	0	888	888	888	2	1	0	2	0	0	1	4	1	1	0	1	0	1	0	0	0	0	0	0	0	0	1	1	1
24	Newala	0	888	888	888	2	1	1	2	0	0	1	2	2	1	0	0	0	1	0	0	0	0	0	0	0	0	1	1	0
25	Newala	0	888	888	888	2	0	888	2	0	0	1	888	888	1	0	0	0	1	0	0	0	0	0	0	0	0	0	0	0
26	Newala	0	888	888	888	2	999	999	1	1	0	1	888	888	1	1	1	0	0	0	0	0	0	0	0	0	0	999	0	0
27	Newala	0	888	888	888	2	1	1	3	1	0	1	4	2	1	0	1	0	1	0	0	0	0	0	1	0	0	1	0	0
28	Newala	1	6	1	0	2	0	888	2	0	0	1	888	888	0	0	1	0	0	0	0	0	0	0	0	0	0	0	0	0
29	Newala	0	888	888	888	2	1	1	1	0	0	1	3	2	1	1	1	0	1	0	0	0	0	0	0	0	0	1	0	0
30	Newala	0	888	888	888	2	0	888	1	0	0	1	888	888	1	0	0	0	1	0	0	0	0	0	0	0	0	0	0	0
31	Newala	0	888	888	888	2	0	0	2	0	0	1	888	888	0	0	0	0	0	0	0	0	0	0	0	0	0	1	0	0
32	Newala	0	888	888	888	2	0	888	2	0	0	1	5	2	0	0	1	0	0	0	0	0	0	0	0	0	0	0	0	0
33	Newala	0	888	888	888	1	0	888	1	0	0	1	3	6	888	888	888	888	888	888	888	888	888	888	888	888	0	888	888	888
34	Newala	0	888	888	888	2	0	0	1	0	0	1	3	888	0	0	1	1	0	0	0	0	0	0	0	0	0	1	0
35	Newala	0	888	888	888	2	0	888	1	0	0	1	3	888	0	0	1	1	0	0	0	0	0	0	0	0	0	0	0	0
36	Newala	0	888	888	888	2	0	0	1	0	0	1	4	2	1	0	1	1	0	0	1	0	0	0	0	0	0	1	0	0
37	Newala	1	999	1	0	2	0	888	1	0	0	1	2	1	1	0		0	1	0	0	0	0	0	0	0	0	0	0	0
38	Newala	0	888	888	888	2	0	888	2	0	0	1	3	2	1	0	1	0	0	0	0	0	0	0	0	0	0	0	0	0
39	Newala	0	888	888	888	2	1	1	1	0	0	1	999	999	1	0	1	0	0	0	0	0	0	0	0	0	0	1	0	0
40	Newala	0	888	888	888	2	0	888	2	0	0	1	888	888	1	0	0	0	0	0	0	0	0	0	0	0	0	0	0	0
41	Newala	0	888	888	888	2	0	888	888	0	0	1	4	1	1	0	1	1	0	0	1	0	0	0	0	0	0	0	0	0
42	Newala	0	888	888	888	2	1	1	0	0	0	1	888	888	1	0	0	0	1	1	0	1	0	0	0	0	0	1	0	0
43	Newala	0	888	888	888	2	0	888	888	0	0	1	3	2	1	0	0	0	1	1	0	0	0	0	0	0	0	0	0	0
44	Newala	0	888	888	888	2	1	1	2	1	0	1	3	4	0	0	0	0	0	0	0	0	0	0	0	0	0	1	0	0
45	Newala	0	888	888	888	2	0	888	1	0	0	1	888	888	1	0	1	1	0	0	0	0	1	0	0	0	0	0	0	0
46	Newala	1	999	1	0	2	1	1	2	1	1	0	888	888	1	0	0	0	1	0	0	0	0	0	0	0	0	1	0	0
47	Newala	0	888	888	888	2	1	1	3	0	0	1	3	3	1	0	0	0	1	0	0	0	0	0	0	0	0	1	0	0
48	Newala	0	888	888	888	2	1	1	2	0	0	1	3	2	1	0	0	0	0	0	1	0	0	0	0	0	0	1	0	0
49	Newala	0	888	888	888	2	1	1	1	0	0	1	888	888	1	0	0	0	0	0	0	0	0	0	0	0	0	1	0	0
50	Newala	1	999	1	1	1	0	888	2	1	0	1	3	3	888	888	888	888	888	888	888	888	888	888	888	888	888	888	888	888
51	Newala	1	999	1	888	2	0	888	2	0	0	1	888	888	1	0	0	0	1	0	0	0	0	0	0	0	0	0	1	0
52	Newala	1	999	1	1	2	1	1	1	0	0	1	2	1	1	0	0	0	1	0	1	1	0	0	0	0	0	0	0	0
53	Newala	1	999	1	1	2	1	0	0	1	0	1	3	1	1	0	0	0	1	0	0	0	0	0	0	0	0	0	0	0
54	Newala	0	888	888	888	2	1	1	2	1	0	1	888	888	1	0	1	0	0	1	0	0	0	0	0	0	0	1	0	0
55	Newala	1	12	1	1	2	1	1	2	0	0	1	888	888	1	1	0	0	1	0	1	0	0	0	0	0	0	1	0	0
56	Newala	0	888	888	888	2	1	1	1		0	1	4	1	1	0	0	0	0	0	0	1	0	0	0	0	0	1	0	0
57	Newala	1	2	1	0	2	0	888	2	0	0	1	6	4	1	0	0	0	0	0	0	0	0	0	0	0	0	0	0	0
58	Newala	1	999	1	888	999	0	888	888	0	0	1	888	888	888	888	888	888	888	888	888	888	888	888	888	888	888	888	888	888
59	Newala	1	999	1	1	2	1	1	2	0	0	1	888	888	1	0	0	0	1	0	1	0	0	0	0	0	0	1	0	0
60	Newala	1	999	1	888	2	0	888	0	0	0	1	3	3	1	1	0	0	0	1	0	0	0	0	0	0	0	0	0	0
61	Mtwara R	0	888	888	888	2	0	0	1	0	0	1	4	4	1	0	0	1	0	0	0	0	0	0	0	0	0	1	0	0
62	Mtwara R	1	888	1		2	0	0	1	0	0	1	4	888	1	0	0	1	0	0	0	0	0	0	0	0	0	1	0	0
63	Mtwara R	0	888	888	888	2	999	999	2	0	0	1	888	888	1	0	0	1	0	0	0	0	0	0	0	0	0	1	0	0
64	Mtwara R	0	888	888	888	2	1	1	2	0	0	1	4	888	1	0	0	1	0	0	0	0	0	0	0	0	0	1	0	0
65	Mtwara R	0	888	888	888	2	0	888	1	0	0	1	4	1	0	0	0	0	0	0	1	0	0	1	0	0	0	0	0	0
66	Mtwara R	1	4	1	1	2	0	888	2	0	0	1	888	888	1	0	0	0	0	1	1	0	0	0	0	0	0	0	0	0
67	Mtwara R	1	11	1	0	2	1	1	1	0	0	1	888	888	1	0	0	1	0	0	0	0	0	0	0	0	0	1	0	0
68	Mtwara R	0	888	888	888	2	1	1	888	0	0	1	888	888	1	0	0	1	0	0	0	0	0	0	0	0	0	1	0	0
69	Mtwara R	1	999	0	888	2	1	1	2	0	0	1	4	888	1	1	0	1	0	0	0	0	0	0	0	0	0	1	0	0
70	Mtwara R	1	999	1	0	2	1	1	1	0	0	1	4	888	1	0	0	1	0	0	1	0	0	0	0	0	0	1	0	0
71	Mtwara R	0	888	888	888	1	1	0	0	0	0	1	888	888	888	888	888	888	888	888	888	888	888	888	888	888	888	888	888	888
72	Mtwara R	0	888	888	888	2	1	0	2	0	0	1	5	2	1	0	0	1	0	0	0	0	0	0	0	0	0	1	0	0
73	Mtwara R	1	13	1	1	2	1	1	2	0	0	1	5	4	1	0	0	1	0	1	0	0	0	0	0	0	0	1	0	0
74	Mtwara R	0	888	888	888	2	1	1	1	0	0	1	4	888	1	1	0	0	0	0	0	0	0	0	0	0	0	1	0	0
75	Mtwara R	0	888	888	888	2	1	0	888	0	0	1	5	8	1	0	0	1	0	0	0	0	0	0	0	0	0	1	0	0
76	Mtwara R	0	888	888	888	2	1	1	0	0	0	1	3	888	1	1	0	1	0	0	0	0	0	0	0	0	0	1	0	0
77	Mtwara R	0	888	888	888	2	0	888	2	0	0	1	888	888	1	1	0	1	0	1	0	0	0	0	0	0	0	0	0	0
78	Mtwara R	1	7	0	0	2	1	0	1	0	0	1	4	4	1	0	0	1	0	0	1	0	0	0	0	0	0	0	0	0
79	Mtwara R	1	13	1	0	2	1	1	888	0	0	1	3	888	0	1	0	0	1	1	0	0	0	0	0	0	0	1	0	0
80	Mtwara R	1	14	1	1	2	1	0	2	0	0	1	3	1	1	0	0	0	1	0	0	0	0	0	0	0	0	0	0	0
81	Mtwara R	0	888	888	888	2	0	888	1	0	0	1	2	2	1	1	0	0	1	1	0	0	0	0	0	0	0	0	0	0
82	Mtwara R	1	14	1	1	2	0	0	1	0	0	1	4	888	1	1	0	1	0	0	0	0	0	0	0	0	0	1	0	0
83	Mtwara R	1	5	1	1	2	1	1	2	0	0	1	3	1	1	0	0	0	1	1	0	0	0	0	0	0	0	0	0	0
84	Mtwara R	1	4	1	0	2	1	0	1	0	0	1	6	888	0	1	0	1	0	0	0	0	0	0	0	0	0	1	0	0
85	Mtwara R	1	8	1	0	2	0	888	2	0	0	1	4	2	0	0	0	0	1	1	1	1	0	0	0	0	0	0	0	0
86	Mtwara R	0	888	888	888	2	1	1	888	0	0	1	888	888	0	0	0	0	0	0	0	0	0	0	0	0	0	1	0	0
87	Mtwara R	0	888	888	888	2	1	0	1	0	0	1	888	888	1	1	0	1	0	0	0	0	0	0	0	0	0	1	0	0
88	Mtwara R	1	999	1	1	1	0	888	2	0	0	1	888	888	0	0	0	0	0	1	0	0	0	0	0	0	0	0	0	0
89	Mtwara R	0	888	888	888	999	1	0	888	0	0	1	888	888	0	0	0	0	0	0	0	0	0	0	0	0	0	1	0	0
90	Mtwara R	1	15	1	1	2	1	1	888	0	0	1	3	1	0	0	0	0	1	0	1	0	0	0	0	0	0	1	0	0
91	Mtwara R	0	888	888	888	1	0	888	888	0	0	1	4	4	888	888	888	888	888	888	888	888	888	888	888	888	888	888	888	888
92	Mtwara R	1	11	1	1	2	1	0	888	0	0	1	4	1	1	1	0	0	0	1	0	0	0	0	0	0	0	0	0	0
93	Mtwara R	1	999	1	1	1	0	888	888	0	0	1	888	888	888	888	888	888	888	888	888	888	888	888	888	888	888	888	888	888
94	Mtwara R	1	12	1	0	1	0	888	888	0	0	1	888	888	888	888	888	888	888	888	888	888	888	888	888	888	888	888	888	888
95	Mtwara R	1	11	1	1	2	1	0	1	0	0	1	3	2	1	1	0	0	0	1	0	0	0	0	0	0	0	0	0	0
96	Mtwara R	1	999	1	0	2	1	0	1	0	0	1	4	888	0	0	0	0	0	0	0	0	0	0	0	0	0	1	0	0
97	Mtwara R	1	7	1	1	2	1	0	2	0	0	1	888	888	0	0	0	0	0	0	0	0	0	0	0	0	0	1	0	0
98	Mtwara R	1	999	1	0	2	999	999	0	0	0	1	4	888	1	1	0	0	0	0	0	0	0	0	0	0	0	1	0	0
99	Mtwara R	1	11	1	0	2	1	0	1	0	0	1	888	888	0	0	0	0	0	0	0	0	0	0	0	1	0	1	0	0
100	Mtwara R	1	14	1	1	2	1	0	1	0	0	1	5	2	0	0	0	0	0	1	0	1	0	0	0	0	0	1	0	0
101	Mtwara R	1	1	1	1	2	1	0	1	0	0	1	5	2	1	0	0	0	1	1	0	0	0	0	0	0	0	0	0	0
102	Mtwara R	0	888	888	888	2	1	0	2	0	0	1	3	1	0	0	0	0	0	0	0	0	1	0	0	0	0	1	0	0
103	Mtwara R	1	999	0	0	2	999	999	888	0	0	1	4	4	0	1	0	0	0	1	0	0	0	0	0	0	0	1	0	0
104	Mtwara R	1	999	1	0	2	1	0	1	0	0	1	5	888	0	0	0	0	1	0	0	0	0	0	0	0	0	1	0	0
105	Mtwara R	1	15	1	1	2	1	0	888	0	0	1	4	1	1	1	0	0	1	1	0	0	0	0	0	0	0	1	0	0
106	Mtwara R	0	888	888	888	2	999	999	1	0	0	1	4	888	1	1	0	1	0	0	0	0	0	0	0	0	0	1	0	0
107	Mtwara R	0	888	888	888	2	1	0	3	0	0	1	5	888	0	0	0	0	0	0	0	0	0	0	0	0	0	1	0	0
108	Mtwara R	1	3	1	1	2	1	0	2	0	0	1	888	1	0	0	0	0	0	0	0	0	0	0	0	0	0	1	0	0
109	Mtwara R	1	999	999	999	2	1	1	1	1	1	0	888	888	0	0	0	0	0	0	0	0	0	0	0	0	0	1	0	0
110	Mtwara R	1	3	1	0	2	999	999	2	0	0	1	5	888	0	0	0	1	0	0	0	0	0	0	0	0	0	1	0	0
111	Mtwara R	0	888	888	888	2	1	1	1	0	0	1	4	2	0	0	0	0	0	0	0	0	0	0	0	0	0	1	0	0
112	Mtwara R	0	888	888	888	2	999	999	3	0	0	1	888	888	0	0	0	0	0	0	0	0	0	0	0	0	1	1	0	0
113	Mtwara R	1	14	1	1	2	1	0	2	0	0	1	4	888	0	1	0	0	0	0	0	0	0	0	0	0	0	1	0	0
114	Mtwara R	1	15	1	0	2	1	1	1	0	0	1	5	888	0	0	0	0	0	0	0	0	0	0	0	0	0	1	0	0
115	Mtwara R	1	3	1	0	2	1	1	888	0	0	1	888	888	1	1	0	1	0	0	0	0	0	0	0	0	0	1	0	0
116	Mtwara R	0	888	888	888	2	1	0	888	0	0	1	5	888	1	1	0	1	0	0	0	0	0	0	0	0	0	1	0	0
117	Mtwara R	1	9	1	0	2	1	0	1	0	0	1	5	888	0	0	0	1	0	0	0	0	0	0	0	0	0	1	0	0
118	Mtwara R	0	888	888	888	2	1	0	2	0	0	1	5	7	0	0	0	0	0	0	0	0	0	0	0	0	0	1	0	0
119	Mtwara R	0	888	888	888	2	1	0	1	0	0	1	5	888	0	0	0	1	0	0	0	0	0	0	0	0	0	1	0	0
120	Newala	1	999	1	888	2	1	0	0	0	0	1	4	2	1	1	0	0	0	1	0	0	0	0	0	0	0	1	0	0
